# Supplementary material for: Bridging the gap: associations of provider enrollment in OKCAPMAP with social deprivation, child abuse, and barriers to access in the state of Oklahoma, USA
Source: publisher site journal article supplement (doi:10.1515/jom-2024-0186), 2025-04-15
Supplement: Supplementary file 1 [file j_jom-2024-0186_suppl_001.docx]

| **Appendix 1.** Correlations of provider enrollment in OKCAPMAP with social determinants of health-related data at the zip code level. | | |
| --- | --- | --- |
| Data set and variables | R | P-value |
| **Places** |  |  |
| Persons aged 65 years or older | -0.14 | <.001 |
| No broadband internet subscription among households | -0.19 | <.001 |
| Crowding among housing units | -0.04 | .28 |
| Housing cost burden among households | 0.27 | <.001 |
| No high school diploma among adults aged 25 years or older | -0.12 | .002 |
| Persons living below 150% of the poverty level | -0.06 | .13 |
| Persons of racial or ethnic minority status | 0.13 | .001 |
| Single-parent households | 0.09 | .018 |
| Unemployment among people 16 years and older in the labor force | -0.04 | .34 |
| Current lack of health insurance among adults aged 18-64 years | -0.04 | .33 |
| **Child abuse filings from Oklahoma State Court Network (2011-2021)** | | |
| Accessory to abuse | 0.08 | .08 |
| Failure to provide | -0.01 | .74 |
| Failure to protect | 0.16 | <.001 |
| Neglect | 0.13 | .002 |
| Physical abuse | 0.40 | <.001 |
| Sexual abuse | 0.31 | <.001 |
| Solicitation | 0.28 | <.001 |
| Witness of abuse | 0.35 | <.001 |
| Total counts of abuse | 0.39 | <.001 |
| **Social deprivation measures** (https://www.graham-center.org/maps-data-tools/social-deprivation-index.html) | | |
| Social Deprivation Index | 0.10 | .013 |
| Percent Population Less Than 100% FPL | -0.01 | .710 |
| Percent Single Parent Families With Dependents < 18 years | 0.17 | <.001 |
| Percent Population 25 Years or More With Less Than 12 Years of Education | -0.17 | <.001 |
| Percent Households With No Vehicle | 0.19 | <.001 |
| Percent Households Living in Renter-Occupied Housing Units | 0.36 | <.001 |
| Percent Households Living in Crowded Housing Units | 0.02 | .60 |
| Percent Non-Employed for Population 16-64 years | -0.18 | <.001 |
| **Zip code population** | | |
| Population within zip code | 0.54 | <.001 |
